# Supplementary material
Source: publisher site journal article supplement (https://www.dovepress.com/article/353914)
Supplement: Supplementary file 1 [file get_supplementary_file.php]

**Supplementary Material S1**

**Pathological diagnosis of HCC**

Pathological diagnosis of HCC is based on the International Consensus recommendations using the required histological and immunohistological analyses.[1]

**Clinical diagnosis of HCC**

Non-invasive criteria are applied to patients with high risk for nodule(s) ≥1 cm, and are based on imaging techniques obtained by multiphasic CT, dynamic contrast-enhanced MRI. Diagnosis is based on the identification of the typical hallmarks of HCC, which differ according to imaging techniques or contrast agents (APHE with washout in the portal venous or delayed phases on CT and MRI using extracellular contrast agents or gadobenate dimeglumine, APHE with washout in the portal venous phase on MRI using gadoxetic acid).[1]

**Data Collection**

Electronic medical records were reviewed to collect clinical and laboratory data for each patient. Data included age, sex, presence of cirrhosis, serum AFP, total bilirubin level, Child-pugh class, underlying liver disease, treatment modality, time (months) between LRT and treatment response evaluation, size and segment location of each lesion.

**Imaging protocols** **and scanning parameters of CEUS**

The ultrasound equipment was as follows: (1) Acuson Sequoia 512 with a 4 V1 vector transducer (frequency range, 1.0–4.0 MHz) and a contrast-specific mode of contrast pulse sequencing; (2) Aplio SSA-770 or Aplio 500 with a 375BT convex transducer (frequency range, 1.9–6.0 MHz) and a Contrast Harmonic Imaging mode; and (3) Aixplorer Ultrasound system equipped with the SC6–1 convex probe (frequency range, 1.0–6.0 MHz). The process of contrast-enhanced ultrasound was as followed: first, the entire liver was scanned with grayscale ultrasound and doppler ultrasound. Then, the imaging mode was changed to CEUS. A 2.4-ml bolus of SonoVue (Bracco Imaging SpA, Milan, Italy) was injected into the antecubital vein, and then received a flush with 5 ml of 0.9% saline solution. The CEUS process was classified into AP (from 10–20 s to 30–45 s after the injection), PVP (from 30–45 s to 120 s after the injection), and LP (121–360 s after the injection). Videos were recorded as digital imaging data and communications in medicine (DICOM) files.

**Imaging protocols and scanning parameters of CT**

CECT was performed with one of the following equipment: a 64-detector row (Aquilion CXL, Toshiba Medical System, Tokyo, Japan) or 320-detector row CT machine (Aquilion One, Toshiba Medical System, Tokyo, Japan). The scanning parameters were set as follows: tube voltage, 120 kV; tube current, 250 mA; and slice thicknesses, 1 mm and 10 mm. After a routine unenhanced scan, 1.5 mL/kg of contrast media (Ultravist, Bayer, Germany) was injected into an antecubital vein at a rate of 3.0 mL/s via a pump injector (P3T abdomen module, Medrad Inc.). The hepatic arterial phase CT images were obtained at 35 s, and the portal venous phase CT images were obtained at 65 s. Unenhanced, hepatic arterial phase and portal venous phase CT images were collected, and images were recorded as digital imaging data and communications in medicine (DICOM) files.

**Imaging protocols and scanning parameters of MRI**

MRI examination was performed by using a 3.0-T system (Siemens Healthineers). Eight-channel phased array coil was used, and the scanning scale covered from the top to the lower edge of the liver. The MR scan sequence included: half-Fourier single-shot turbo spin-echo (HASTE) sequence, fast low angle shot (FLASH) T1WI in/out of phase sequence imaging, FLASH T1WI fat suppression (FS) sequence axial imaging, and turbo spin-echo (TSE) T2WI navigation trigger axial imaging. The images in arterial phase, portal phase, and hepatic venous phase were obtained by performing three-dimensional volume interpolated breath hold test (3D VIBE) T1WI (FS) sequence during suspended respiration at 30–35 s, 65–70 s, and 100–120 s, respectively, after as bolus injection of Gd-EOB-DTPA (Primovist®,0.1 mL/kg body weight) with a flow rate of 1 mL/s. Additional hepatobiliary phase images were obtained at 20 min after injection. Images were recorded as digital imaging data and communications in medicine (DICOM) files.

**The details of the diagnoses of viable lesions were shown in the supplementary material.**

First, both CT and MRI indicated viable lesion and the patient was submitted to further treatment (n=42). Second, biopsy or hepatectomy was performed and the lesion was confirmed to be viable by histopathology（n=25）. Third, the non-enhancement area or equivocal area became typical arterial enhancement with subsequent washout or an increase of 20% of the diameters of the equivocal area in the follow-up CT/MRI（n=51）.

Reference:

1 European Association For The Study Of The L, European Organisation For R, Treatment Of C (2012) EASL-EORTC clinical practice guidelines: management of hepatocellular carcinoma. J Hepatol 56:908-943

**Table S1 Categories of CEUS treatment response features for liver treated lesions.**

| Response Category | Criteria |
| --- | --- |
| CEUS TRA Nonviable | No lesional enhancement OR  Treatment-specific expected enhancement pattern |
| CEUS TRA Equivocal | Enhancement atypical for treatment-specific expected enhancement pattern and not meeting criteria for probably or definitely viable |
| CEUS TRA Viable | Nodular, masslike, or thick irregular tissue in or along the treated lesion with any of the following:  Arterial phase hyperenhancement OR  Washout appearance OR  Enhancement similar to pretreatment |

Note. - TRA = treatment response algorithm; CEUS = contrast-enhanced ultrasonography.

**Table S2 CEUS treatment response features for liver treated lesions.**

| CEUS treatment response features | Criteria |
| --- | --- |
| Treatment-specific expected enhancement | Expected temporal and spatial pattern of posttreatment enhancement attributable to treatment-related changes in parenchymal perfusion. |
| No lesional enhancement | Absence of enhancement within or along the margin of a treated lesion. Complete disappearance after locoregional treatment is considered equivalent to absence of enhancement. |
| Posttreatment APHE | Nodular, masslike, or thick and irregular APHE contained within or along the margin of a treated lesion suggests posttreatment tumor viability. |
| Posttreatment washout | Nodular, masslike, or thick and irregular washout appearance contained within or along the margin of a treated lesion suggests posttreatment tumor viability. |
| Posttreatment enhancement similar to pretreatment | Nodular, masslike, or thick and irregular enhancement similar to pretreatment enhancement in all postcontrast phases contained within or along the margin of a treated lesion suggests posttreatment tumor viability, even in the absence of APHE or washout appearance. |

Note. - APHE=arterial phase hyperenhancement.

**Table S3 The inter-reader agreement for major features and categories between CEUS Treatment Response Algorithm and CT/MRI Liver Imaging Reporting and Data System Treatment Response Algorithm.**

| TRA Features and Categories | Kappa | 95% CI |
| --- | --- | --- |
| CEUS |  |  |
| APHE | 0.75 | 0.52, 0.98 |
| Washout | 0.63 | 0.36, 0.90 |
| Treatment-specific expected enhancement | 0.55 | 0.10, 0.99 |
| Indeterminate enhancement | 0.56 | 0.17, 0.94 |
| No lesional enhancement | 0.74 | 0.54, 0.93 |
| TRA Category | 0.74 | 0.55, 0.93 |
| Size of viable lesions | ICC=0.91 | 0.87, 0.94 |
| CT/MRI |  |  |
| APHE | 0.72 | 0.52, 0.98 |
| Washout | 0.63 | 0.36, 0.90 |
| Treatment-specific expected enhancement | 0.56 | 0.17, 0.94 |
| Indeterminate enhancement | 0.49 | 0.11, 0.87 |
| No lesional enhancement | 0.76 | 0.58, 0.94 |
| TRA Category | 0.74 | 0.58, 0.90 |
| Size of viable lesions | ICC=0.94 | 0.91, 0.96 |

Note. – APHE = arterial phase hyperenhancement; TRA = Treatment Response Algorithm; CEUS = contrast-enhanced ultrasonography; CT = computed tomography; MRI = magnetic resonance imaging.

**Table S4 Subgroup analysis of the impact of the monitor timing on the performance of CEUS TRA and CT/MRI LI-RADS TRA when TRA equivocal assessments were treated as viable.**

| Interval between LRT and treatment response assessment | Sensitivity (%) | | | Specificity (%) | | | Positive Predictive Value (%) | | Negative Predictive Value (%) | |
| --- | --- | --- | --- | --- | --- | --- | --- | --- | --- | --- |
| CEUS | CT/MRI | *P* Value | CEUS | CT/MRI | *P* Value | CEUS | CT/MRI | CEUS | CT/MRI |
| 1 month (n=157) | 45.2(19/42) | 54.8(23/42) | 0.134 | 98.3(113/115) | 93.0(107/115) | 0.041† | 90.5(19/21) | 74.2(23/31) | 83.1(113/136) | 84.9(107/126) |
|  | [29.9, 61.3] | [38.7, 70.2] |  | [93.9, 99.8] | [86.8, 97.0] |  | [69.6, 98.8] | [55.3, 88.1] | [75.7,89.0] | [77.5, 90.7] |
| 2-6 months (n=80) | 71.4(25/35) | 65.7(23/35) | 0.480 | 93.3(42/45) | 91.1(41/45) | >0.99 | 89.3(25/28) | 85.2(23/27) | 80.8(42/52) | 77.4(41/53) |
|  | [53.7, 85.4] | [47.8, 80.9] |  | [81.7, 98.6] | [78.8, 97.5] |  | [71.8, 97.7] | [66.3, 95.8] | [67.5, 90.4] | [63.8, 87.7] |
| >6 months (n=152) | 68.3(28/41) | 75.6(31/41) | 0.248 | 96.4(107/111) | 97.3(108/111) | >0.99 | 87.5(28/32) | 91.2(31/34) | 89.2(107/120) | 91.5(108/118) |
|  | [51.9,81.8] | [59.7,87.6] |  | [91.3,99.0] | [92.3,99.4] |  | [71.1,96.4] | [76.3,98.1] | [82.2, 94.1] | [85.0, 95.9] |

Note. - Data are percentages, with numerators and denominators in parentheses and 95%Cis in brackets. LI-RADS = Liver Imaging Reporting and Data System; TRA = treatment response algorithm; LRT = locoregional therapy; CEUS = contrast-enhanced ultrasonography, CT = computed tomography, MRI = magnetic resonance imaging.

† *P* <0 .05.

**Table S5 Subgroup analysis of the impact of the lung and intestinal gas shadows on the performance of CEUS TRA and CT/MRI LI-RADS TRA when TRA equivocal assessments were treated as viable.**

| Gas shadows | Sensitivity (%) | | | Specificity (%) | | | Positive Predictive Value (%) | | Negative Predictive Value (%) | |
| --- | --- | --- | --- | --- | --- | --- | --- | --- | --- | --- |
| CEUS | CT/MRI | P value | CEUS | CT/MRI | P value | CEUS | CT/MRI | CEUS | CT/MRI |
| Present (n=75) | 47.6(10/21) | 76.2(16/21) | 0.041† | 94.4(51/54) | 94.4(51/54) | >0.99 | 76.9(10/13) | 84.2(16/19) | 82.3(51/62) | 91.1(51/56) |
|  | [25.7,70.2] | [52.8, 91.8] |  | [84.6, 98.8] | [84.6, 98.8] |  | [46.2,95.0] | [60.4, 96.6] | [70.5, 90.8] | [80.4, 97.0] |
| Absent (n=314) | 63.9(62/97) | 63.9(62/97) | >0.99 | 97.2(211/217) | 94.5(205/217) | 0.041† | 91.2(62/68) | 83.8(62/74) | 85.8(211/246) | 85.4(205/240) |
|  | [53.5, 73.4] | [53.5, 73.4] |  | [94.1,99.0] | [90.5,97.1] |  | [81.8, 96.7] | [73.4,91.3] | [80.8, 89.9] | [80.3, 89.6] |

Note. - Data are percentages, with numerators and denominators in parentheses and 95%Cis in brackets. LI-RADS = Liver Imaging Reporting and Data System; TRA = treatment response algorithm; LRT = locoregional therapy; CEUS = contrast-enhanced ultrasonography; CT = computed tomography; MRI = magnetic resonance imaging.

† *P* <0 .05.
